# Supplementary material
Source: PubMed Central journal article supplement (PMC6955255)
Supplement: JVI.01439-19-s0001.pdf [file JVI.01439-19-s0001.pdf]

Supplemental Figures

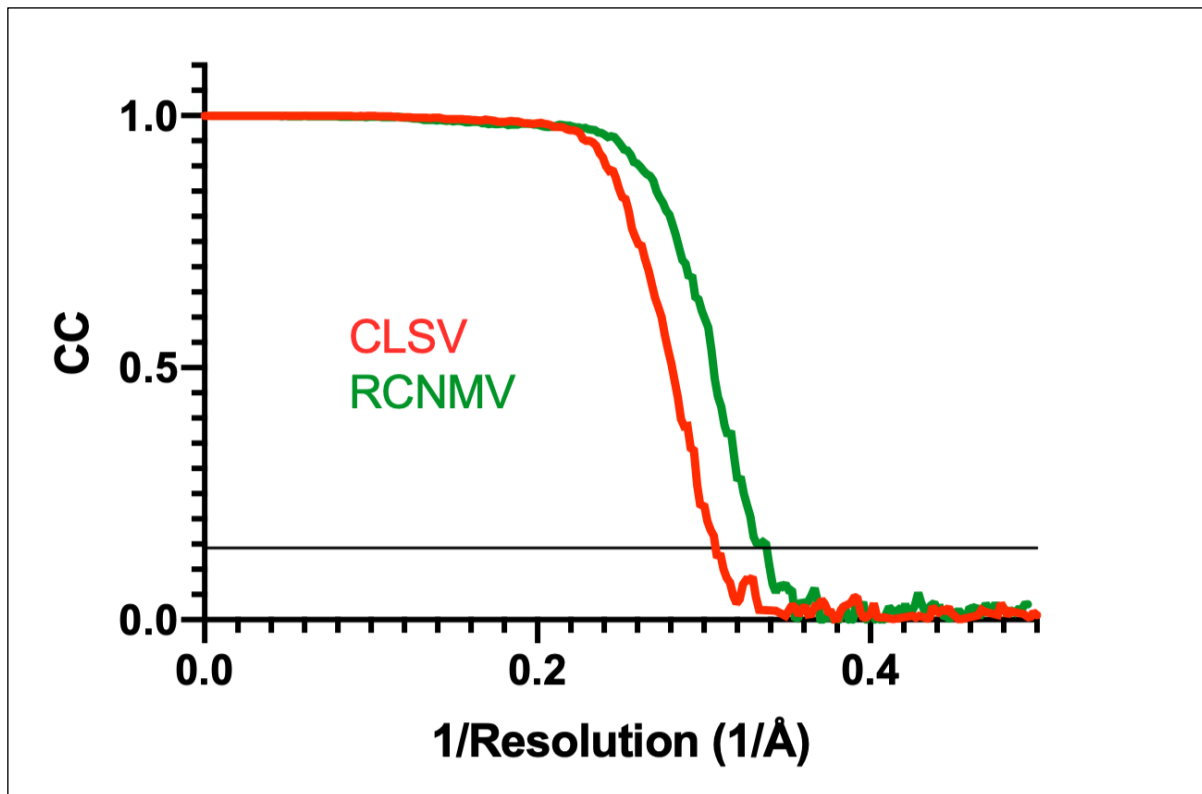

Figure S1: Gold standard Fourier shell correlation (FSC) curves for the two viral cryo-EM models. The black line shows the standard correlation coefficient cutoff of 0.143

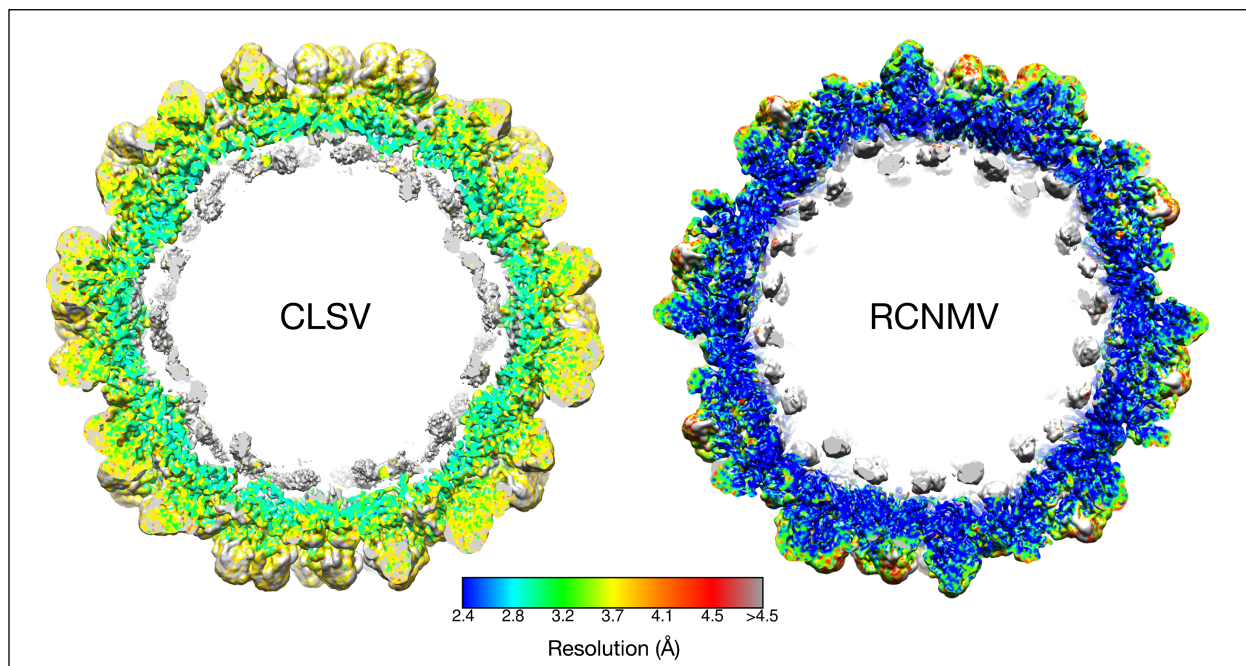

Figure S2: Local resolution maps of the two reconstructions. Shown here are the cutaway midsections of the two reconstructions analyzed with ResMap (1). The color key of each resolution range is shown at the bottom.

1. Kucukelbir A, Sigworth FJ, Tagare HD. 2014. Quantifying the Local Resolution of Cryo-EM Density Maps. *Nature Methods* 11:63-65.
